# Supplementary material for: Association between the Dietary Inflammatory Index and Risk for Cancer Recurrence and Mortality among Patients with Breast Cancer
Source: PubMed Central journal article supplement (PMC6115987; doi:10.3390/nu10081095), 2018-08-15
Supplement: nutrients-10-01095-s001.pdf [file nutrients-10-01095-s001.pdf]

**Table S1.** Daily intake of nutrients and foods in breast cancer patients according to dietary inflammatory index (DII) score <sup>1</sup>

|                              | Tertile of DII                                |                                            |                                          | <i>p</i> -Value <sup>2</sup> |
|------------------------------|-----------------------------------------------|--------------------------------------------|------------------------------------------|------------------------------|
|                              | T1 ( <i>n</i> = 170)<br>-2.37 (-5.87-(-1.07)) | T2 ( <i>n</i> = 170)<br>-0.10 (-1.08-0.97) | T3 ( <i>n</i> = 171)<br>2.40 (0.98-5.48) |                              |
| Carbohydrate (g)             | 261.30 ± 60.61                                | 221.06 ± 52.97                             | 194.11 ± 53.91                           | 0.612                        |
| Protein (g)                  | 70.59 ± 24.24 <sup>a3</sup>                   | 53.52 ± 15.54 <sup>b</sup>                 | 46.11 ± 15.05 <sup>b</sup>               | <0.001                       |
| Total fat (g)                | 37.44 ± 15.04                                 | 31.69 ± 13.93                              | 27.26 ± 14.30                            | 0.358                        |
| Fiber (g)                    | 26.85 ± 7.31 <sup>a</sup>                     | 20.55 ± 4.78 <sup>b</sup>                  | 14.90 ± 4.39 <sup>c</sup>                | <0.001                       |
| Cholesterol (mg)             | 262.59 ± 166.91                               | 209.05 ± 159.44                            | 179.43 ± 144.87                          | 0.510                        |
| SFA (g)                      | 8.99 ± 9.30                                   | 7.05 ± 8.88                                | 6.06 ± 8.80                              | 0.321                        |
| MUFA (g)                     | 12.23 ± 12.58 <sup>a</sup>                    | 9.65 ± 12.12 <sup>ab</sup>                 | 7.25 ± 11.37 <sup>b</sup>                | 0.043                        |
| PUFA (g)                     | 8.68 ± 4.98 <sup>a</sup>                      | 6.78 ± 5.09 <sup>b</sup>                   | 4.71 ± 4.73 <sup>c</sup>                 | <0.001                       |
| <i>n</i> -3 PUFA (g)         | 1.70 ± 1.90 <sup>a</sup>                      | 0.87 ± 1.21 <sup>b</sup>                   | 0.50 ± 0.78 <sup>c</sup>                 | <0.001                       |
| <i>n</i> -6 PUFA (g)         | 6.16 ± 3.50 <sup>a</sup>                      | 5.13 ± 3.45 <sup>a</sup>                   | 3.41 ± 2.73 <sup>b</sup>                 | <0.001                       |
| Thiamin (mg)                 | 1.31 ± 0.43 <sup>a</sup>                      | 1.05 ± 0.36 <sup>b</sup>                   | 0.86 ± 0.37 <sup>c</sup>                 | <0.001                       |
| Riboflavin (mg)              | 1.30 ± 0.43 <sup>a</sup>                      | 0.96 ± 0.30 <sup>b</sup>                   | 0.73 ± 0.28 <sup>c</sup>                 | <0.001                       |
| Niacin (mg NE)               | 16.51 ± 5.03 <sup>a</sup>                     | 12.45 ± 4.17 <sup>b</sup>                  | 9.46 ± 3.58 <sup>c</sup>                 | <0.001                       |
| Vitamin B <sub>6</sub> (mg)  | 1.93 ± 0.60 <sup>a</sup>                      | 1.46 ± 0.47 <sup>b</sup>                   | 1.09 ± 0.46 <sup>c</sup>                 | <0.001                       |
| Vitamin B <sub>12</sub> (µg) | 9.95 ± 7.77 <sup>a</sup>                      | 6.55 ± 5.81 <sup>b</sup>                   | 5.22 ± 4.73 <sup>b</sup>                 | <0.001                       |
| β-carotene (µg)              | 6737.98 ± 3962.47 <sup>a</sup>                | 4068.73 ± 2387.14 <sup>b</sup>             | 2313.51 ± 1543.28 <sup>c</sup>           | <0.001                       |
| Vitamin A (µg RE)            | 1252.73 ± 665.09 <sup>a</sup>                 | 767.70 ± 396.56 <sup>b</sup>               | 465.54 ± 301.55 <sup>c</sup>             | <0.001                       |
| Vitamin C (mg)               | 205.22 ± 131.07 <sup>a</sup>                  | 134.42 ± 92.65 <sup>b</sup>                | 71.10 ± 45.06 <sup>c</sup>               | <0.001                       |
| Vitamin D (µg)               | 5.76 ± 7.61 <sup>a</sup>                      | 3.01 ± 5.16 <sup>b</sup>                   | 1.92 ± 2.61 <sup>b</sup>                 | <0.001                       |
| Vitamin E (mg α-TE)          | 16.47 ± 4.94 <sup>a</sup>                     | 12.87 ± 4.86 <sup>b</sup>                  | 8.74 ± 4.49 <sup>c</sup>                 | <0.001                       |
| Folate (µg)                  | 656.39 ± 208.11 <sup>a</sup>                  | 456.53 ± 120.81 <sup>b</sup>               | 326.63 ± 111.14 <sup>c</sup>             | <0.001                       |
| Iron (mg)                    | 16.99 ± 5.31                                  | 16.06 ± 46.28                              | 9.99 ± 4.16                              | 0.519                        |
| Magnesium (mg)               | 113.46 ± 55.42 <sup>a</sup>                   | 74.79 ± 41.96 <sup>b</sup>                 | 41.57 ± 31.33 <sup>c</sup>               | <0.001                       |
| Zinc (mg)                    | 11.05 ± 4.36                                  | 12.27 ± 46.94                              | 6.90 ± 2.58                              | 0.345                        |
| Selenium (µg)                | 88.22 ± 36.74 <sup>a</sup>                    | 72.55 ± 30.01 <sup>a</sup>                 | 56.68 ± 26.39 <sup>b</sup>               | <0.001                       |
| Pepper (g)                   | 0.05 ± 0.17                                   | 0.05 ± 0.17                                | 0.05 ± 0.18                              | 0.685                        |
| Onion (g)                    | 26.41 ± 28.64 <sup>a</sup>                    | 16.48 ± 15.80 <sup>b</sup>                 | 11.05 ± 15.73 <sup>b</sup>               | <0.001                       |
| Garlic (g)                   | 7.77 ± 8.01 <sup>a</sup>                      | 5.17 ± 5.40 <sup>b</sup>                   | 3.33 ± 4.49 <sup>b</sup>                 | <0.001                       |
| Ginger (g)                   | 1.46 ± 4.61 <sup>a</sup>                      | 0.37 ± 1.31 <sup>b</sup>                   | 0.39 ± 2.00 <sup>b</sup>                 | 0.001                        |
| Turmeric (g)                 | 0.22 ± 0.84 <sup>a</sup>                      | 0.09 ± 0.51 <sup>ab</sup>                  | 0.02 ± 0.20 <sup>b</sup>                 | 0.017                        |
| Alcohol (g)                  | 0.00 ± 0.00                                   | 0.21 ± 2.76                                | 0.24 ± 1.97                              | 0.472                        |
| Caffeine (mg)                | 34.70 ± 51.53                                 | 40.49 ± 53.48                              | 39.14 ± 52.43                            | 0.778                        |
| Green tea (g)                | 0.04 ± 0.27                                   | 0.06 ± 0.42                                | 0.01 ± 0.11                              | 0.395                        |

SFA, saturated fatty acid; MUFA, monounsaturated fatty acid, PUFA, polyunsaturated fatty acid; <sup>1</sup> values are means ± standard deviation (SD); <sup>2</sup> *p*-values were analyzed using analysis of covariance (ANCOVA) after adjusting for age, body mass index (BMI), postmenopausal status, subtype, histologic grade, tumor size, lymph node metastasis, American Joint Committee on Cancer (AJCC) stage, treatment (chemotherapy, hormonal therapy, radiotherapy) and energy intake; <sup>3</sup> values with different letters within row are significantly different at *p* < 0.05 by ANCOVA with Bonferroni post hoc test.
